# Supplementary material for: The short-term outcomes for the early removal of pigtail catheter drainage within 24 hours of uniportal video-assisted anatomic surgery in patients with lung cancer
Source: PubMed Central journal article supplement — Transl Cancer Res. 2022 Sep;11(9):3260–6. doi: 10.21037/tcr-22-1910 (PMC9552068; doi:10.21037/tcr-22-1910), 2022-09
Supplement: tcr-11-09-3260-dss.pdf [file tcr-11-09-3260-dss.pdf]

## Data Sharing Statement

|                     |                                                                                                                                                     |                                                                                                                                           |
|---------------------|-----------------------------------------------------------------------------------------------------------------------------------------------------|-------------------------------------------------------------------------------------------------------------------------------------------|
| <b>Article Info</b> | <a href="https://dx.doi.org/10.21037/tcr-22-1910">https://dx.doi.org/10.21037/tcr-22-1910</a>                                                       |                                                                                                                                           |
| <b>Item</b>         | <b>Question</b>                                                                                                                                     | <b>Authors' Response<br/>(place "-" if not applicable)</b>                                                                                |
| 1                   | Would you like to share data collected for your study to others?                                                                                    | Yes.                                                                                                                                      |
| 2                   | If not, would you like to share the reason for your decision?                                                                                       | -                                                                                                                                         |
| 3                   | What data in particular will be shared?                                                                                                             | The original data of the safety and efficacy of pigtail catheter used as chest tube in patients who underwent anatomic pulmonary surgery. |
| 4                   | Any other documents will be shared? Such as study protocol, statistical analysis plan, informed consent form, clinical study report, analytic code. | Statistical analysis plan and clinical study report will also be shared if requested.                                                     |
| 5                   | When will data availability begin?                                                                                                                  | From the publication date.                                                                                                                |
| 6                   | When will data availability end?                                                                                                                    | Two years within the publication date, since the technique data may be updated over time.                                                 |
| 7                   | To whom will you share the data?                                                                                                                    | Medical oncologists and thoracic surgeons who are interested in studies of thoracic surgery.                                              |
| 8                   | For what type of analysis or purpose?                                                                                                               | For analysis to evaluate the safety and efficacy of pigtail catheter in patients who underwent pulmonary surgery.                         |
| 9                   | How or where can the data/documents be obtained?                                                                                                    | Emails could be sent to the address below to obtain the shared data: xwkpdz@163.com.                                                      |
| 10                  | Any other restrictions?                                                                                                                             | We may balance the potential benefits and risks for each request and then provide the data that could be shared.                          |
